# Supplementary material for: Tissue-Resident Memory T Cells in Pancreatic Ductal Adenocarcinoma Coexpress PD-1 and TIGIT and Functional Inhibition Is Reversible by Dual Antibody Blockade
Source: PubMed Central journal article supplement (PMC10068448; doi:10.1158/2326-6066.cir-22-0121), 2023-01-23
Supplement: cir-22-0121_supplementary_fig.s1_-_s12_suppsf1-sf12.pdf [file cir-22-0121_supplementary_fig.s1_-_s12_suppsf1-sf12.pdf]

# Supplementary Fig. S1

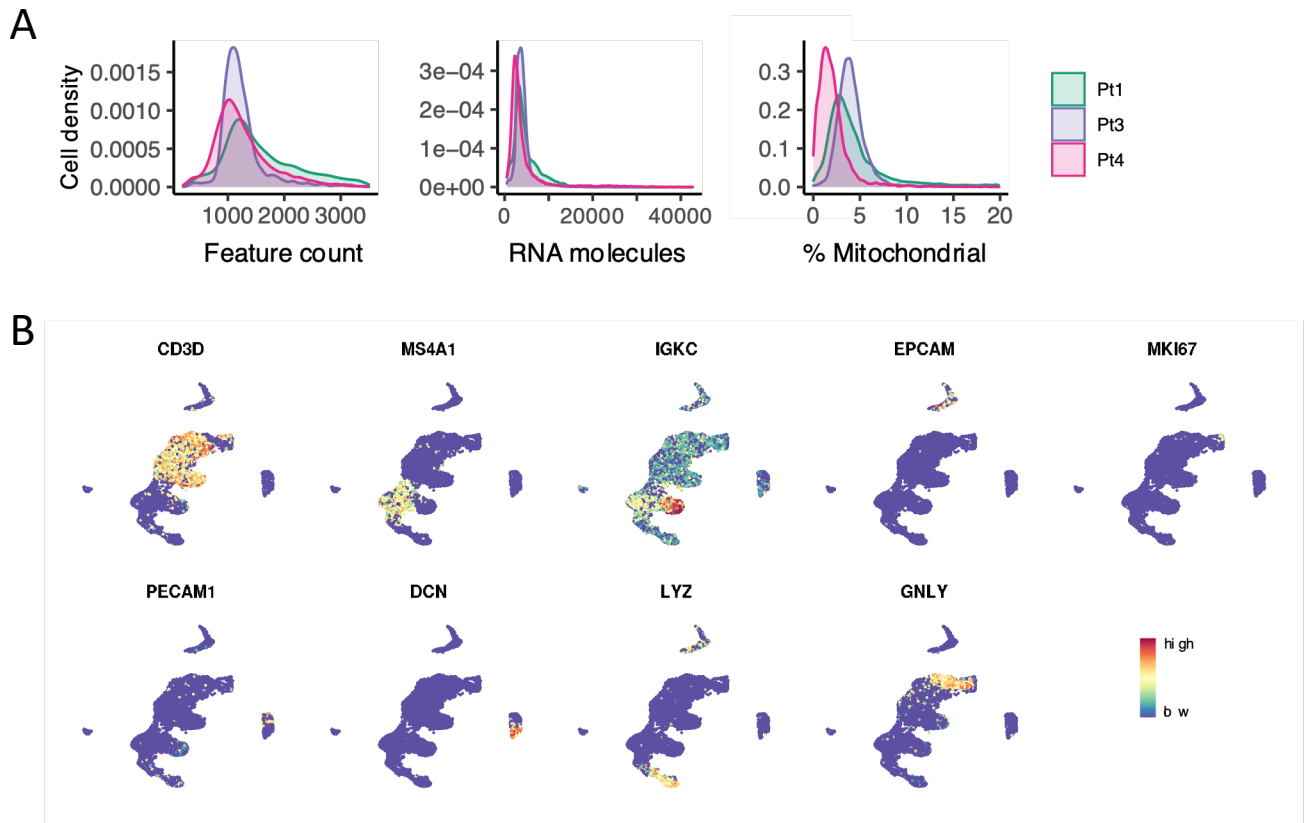

**Fig. S1**

- A. Samplewise Distributions of scRNAseq feature counts, RNA molecule count and % reads mapping to mitochondrial genes
- B. UMAP embedding of integrated scRNAseq data from PDAC samples Pt1, Pt3 and Pt4 overlaid with the raw count expression profile of canonical high level cell type marker genes

# Supplementary Fig. S2

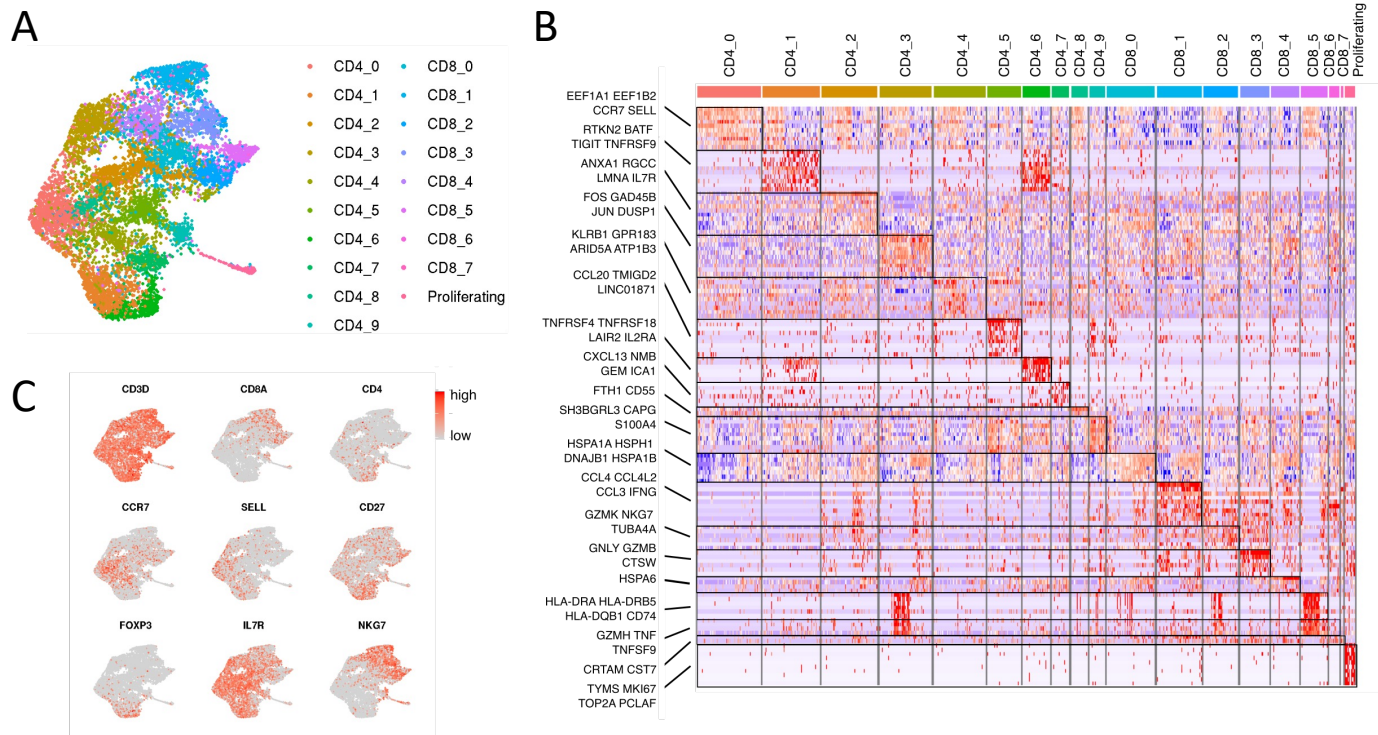

**Fig. S2**

- UMAP embedding of T cell only scRNAseq data overlaid with cluster label identified by unsupervised clustering.
- Normalized and scaled expression profile of the top marker genes identified as overexpressed in each cluster.
- UMAP embedding of T cell data overlaid with raw count expression profile of canonical T-cell phenotypic markers of interest.

# Supplementary Fig. S3

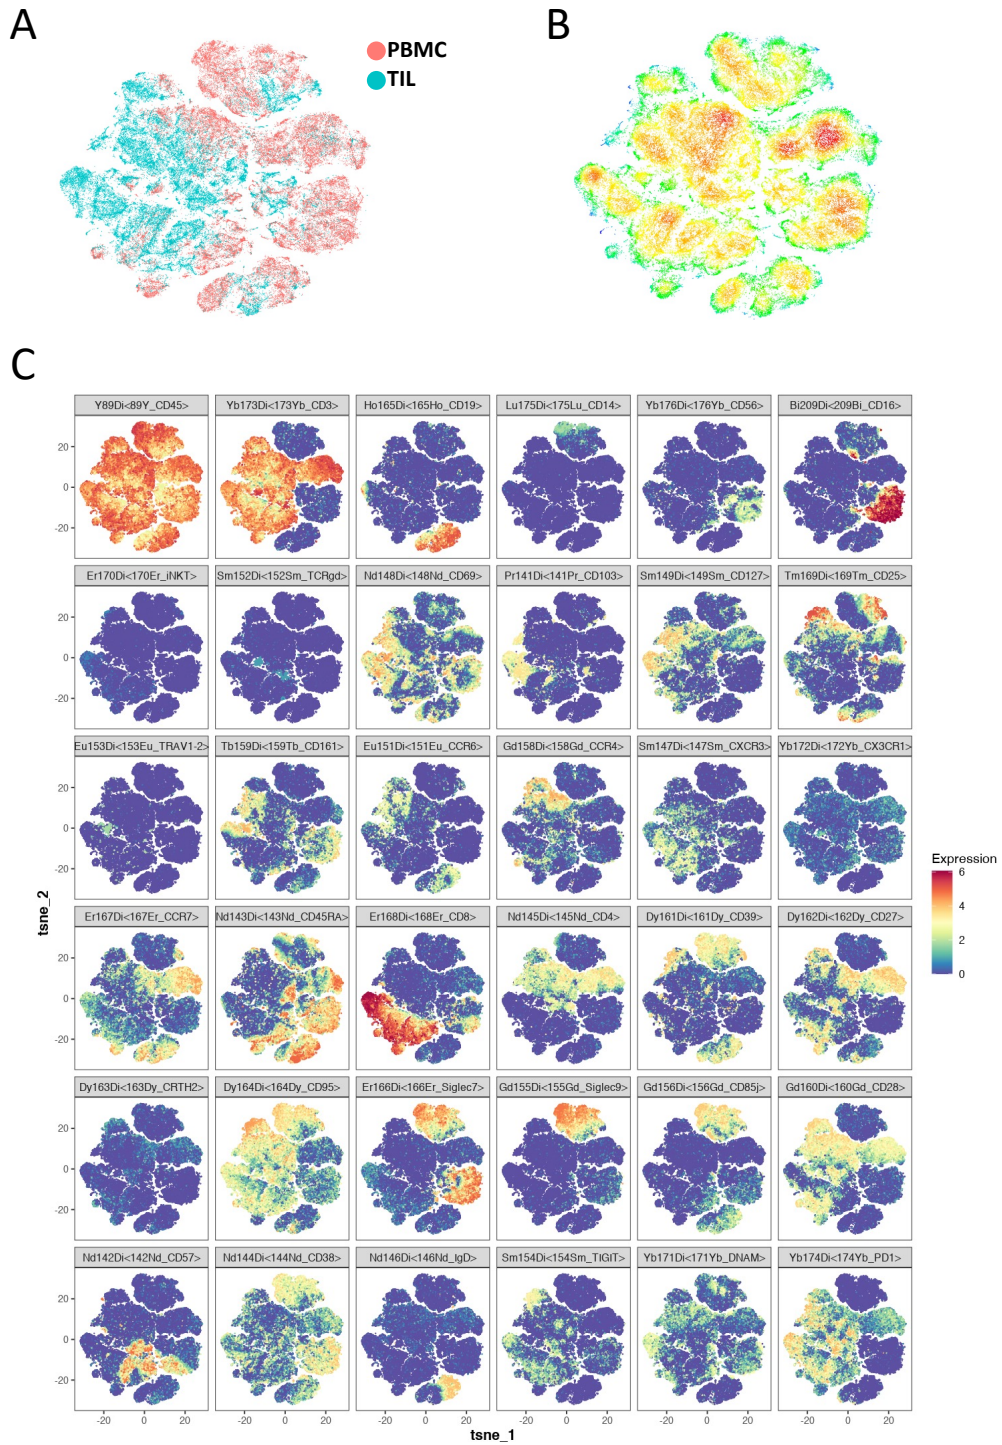

**Fig. S3**

- A. t-SNE plots of combined PBMC and TIL CyTOF data coloured by sample type.  
B. t-SNE plots of combined PBMC and TIL CyTOF data coloured by cell density.  
C. Individual t-SNE plots of combined PBMC and TIL CyTOF data showing expression level of each marker of interest.





# Supplementary Fig. S5

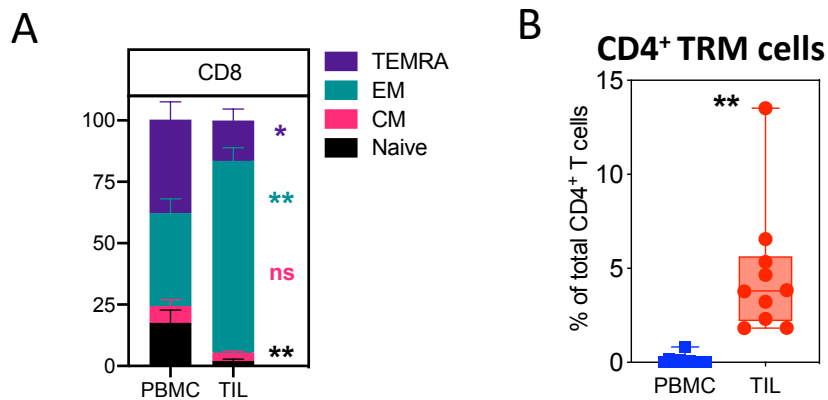

**Fig. S5**

A. Stacked bar graph showing the proportion of Naive, EM, CM and TEMRA subsets in CD8+ T-cells from matched PBMC and TIL (n=10).

B. Box and whisker plot showing the proportion of CD4 TRM cells of total CD4 T cells in PBMC and TIL (n=10).

Comparisons analyzed using Wilcoxon matched-pairs signed rank test. \* $p < 0.05$ , \*\* $p < 0.01$ .

# Supplementary Fig. S6

A

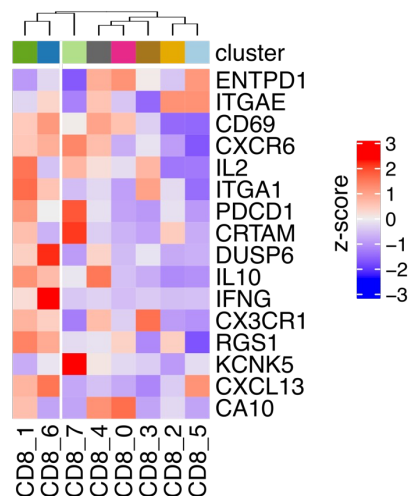

B

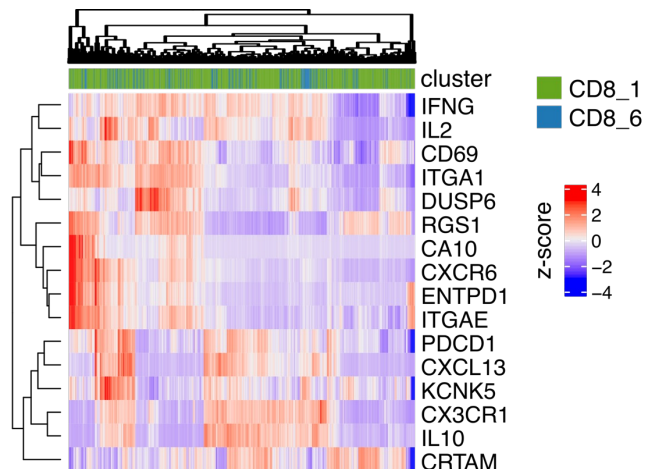

C

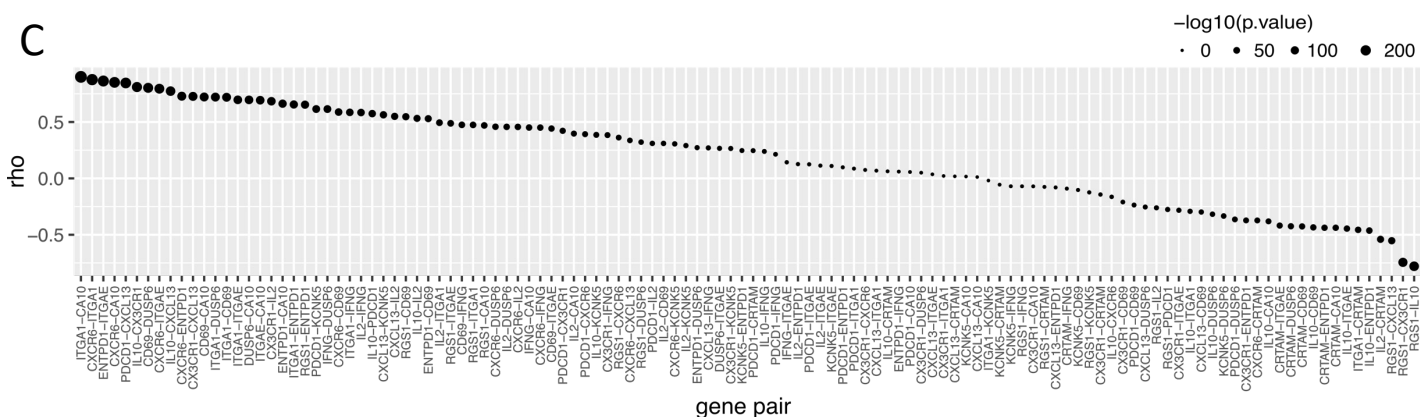

**Fig. S6**

- A. Average within CD8 T cell cluster gene expression profile of a core set of TRM genes.
- B. Single cell level imputed gene expression profile of a core set of TRM genes within TRM CD8 T cell clusters (CD8\_1 and CD8\_6).
- C. Single cell level Spearman's pairwise correlations of TRM genes within cells from TRM clusters CD8\_1 and CD8\_6.

# Supplementary Fig. S7

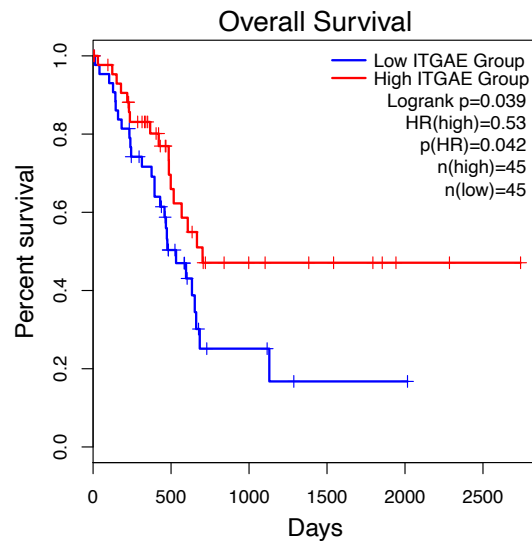

**Fig. S7**

Overall survival (OS) analysis of PDAC patients from the TCGA-PAAD dataset based on the expression level of ITGAE (CD103) in tumor tissue.

# Supplementary Fig. S8

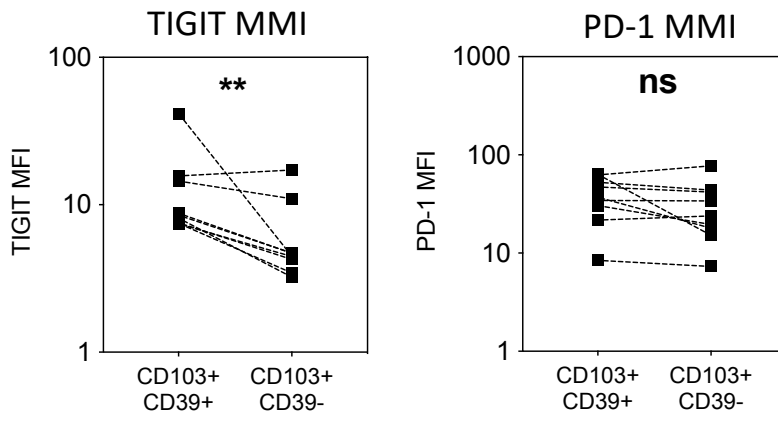

**Fig. S8**

Line graphs comparing the MMI of TIGIT and PD-1 on CD39+ and CD39- CD8+ TRM cells from PDAC TIL (n=10). Comparison analyzed using Wilcoxon matched-pairs signed rank test. \*\*p<0.01.



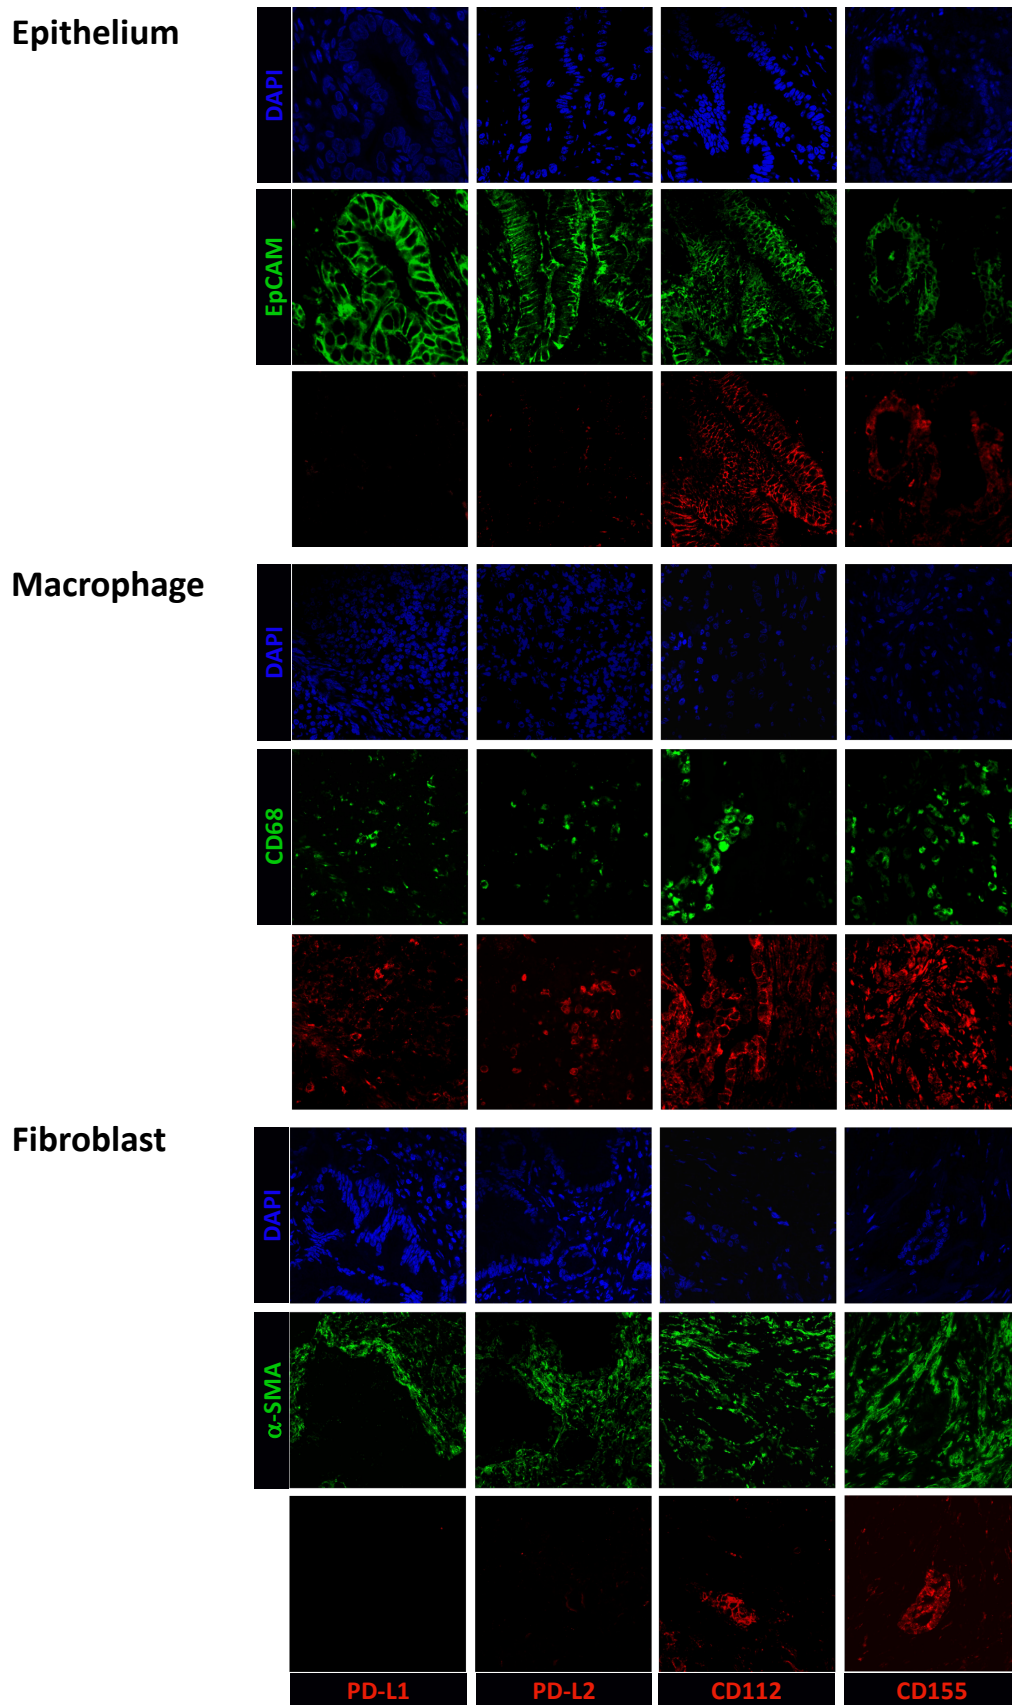

**Fig. S9**

Representative single color confocal images of immunofluorescent staining for PD-1 and TIGIT ligands on tumor epithelium (EpCAM+), macrophages (CD68+) and stroma/fibroblasts ( $\alpha$ -SMA+) using PDAC FFPE tissue (n=10 patients).

# Supplementary Fig. S10

A

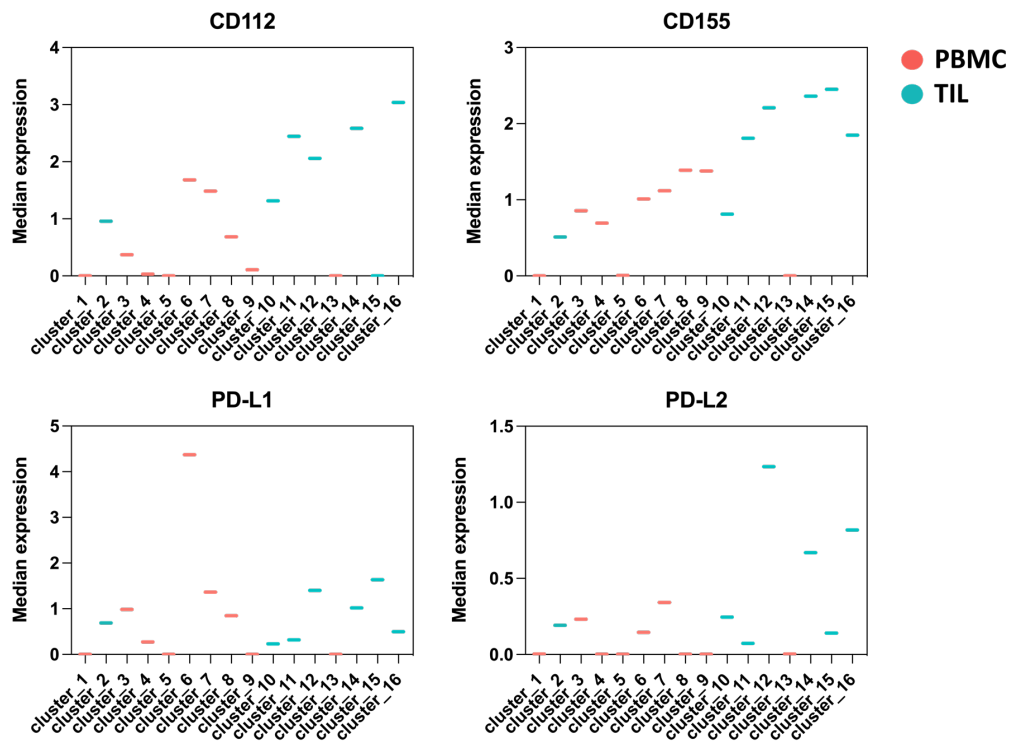

B

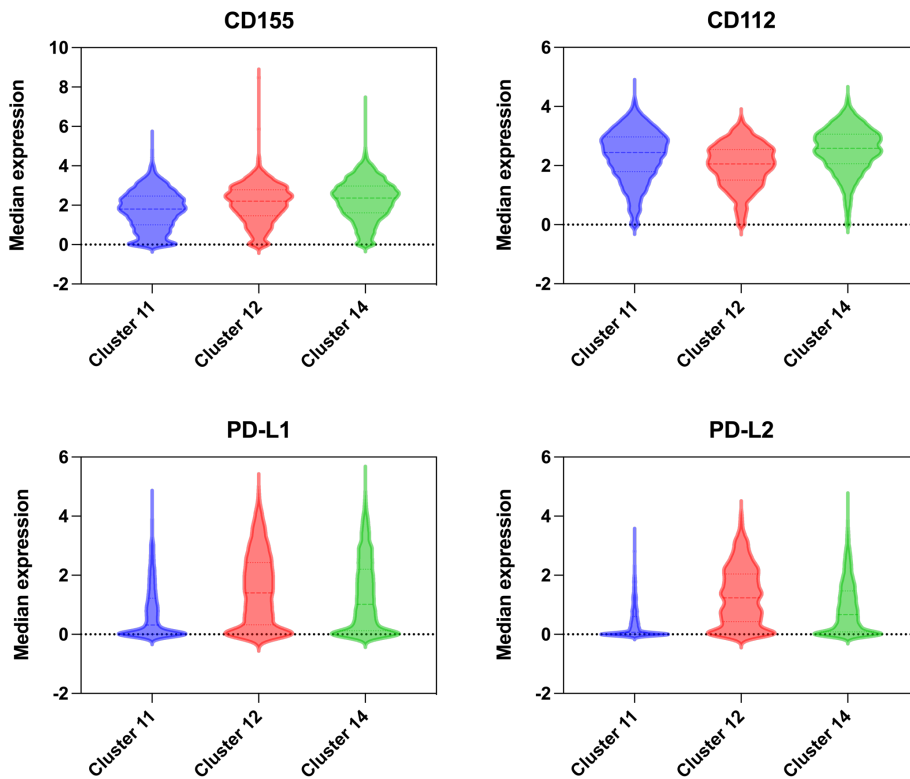

**Fig. S10**

- A. Median expression of TIGIT and PD-1 ligands across all Phenograph cluster from myeloid-focused CyTOF panel (n=10 patients). Line colour represents the compartment (PBMC or TIL) of which the cluster is predominantly comprised.
- B. Violin plots representing median expression on a per cell basis of TIGIT and PD-1 ligands across clusters 11, 12 and 14.

# Supplementary Fig. S11

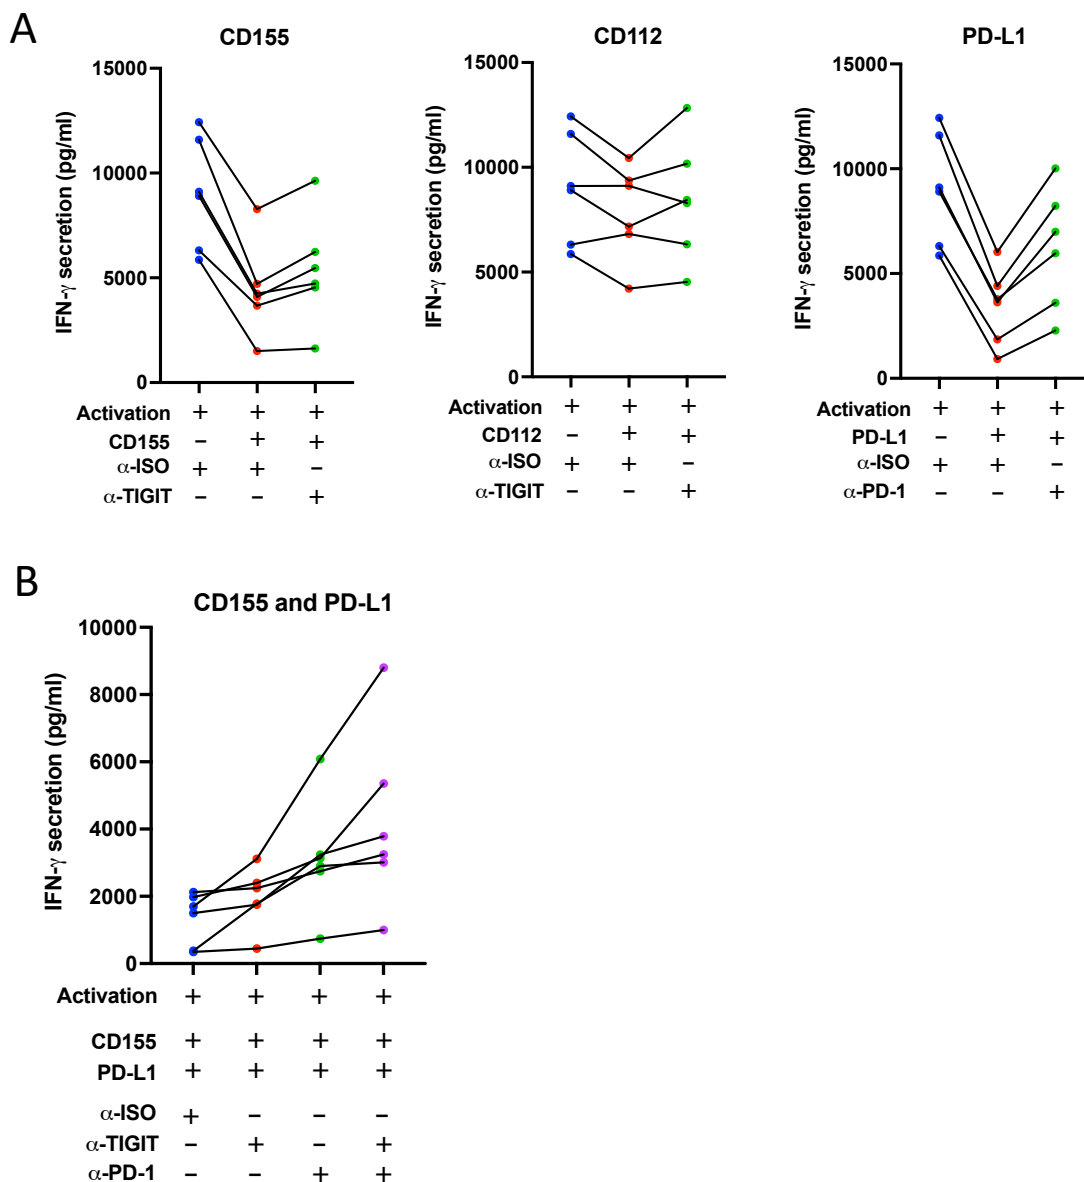

**Fig. S11**

IFN- $\gamma$  production by T cells was quantified by ELISA following 4-day co-culture with aAPCs expressing A) CD155, CD112 or PD-L1, and B) dual CD155 and PD-L1. Monoclonal blocking antibodies pre-incubated with T cells are indicated on the x-axis. Each line represents an individual patient.

# Supplementary Fig. S12

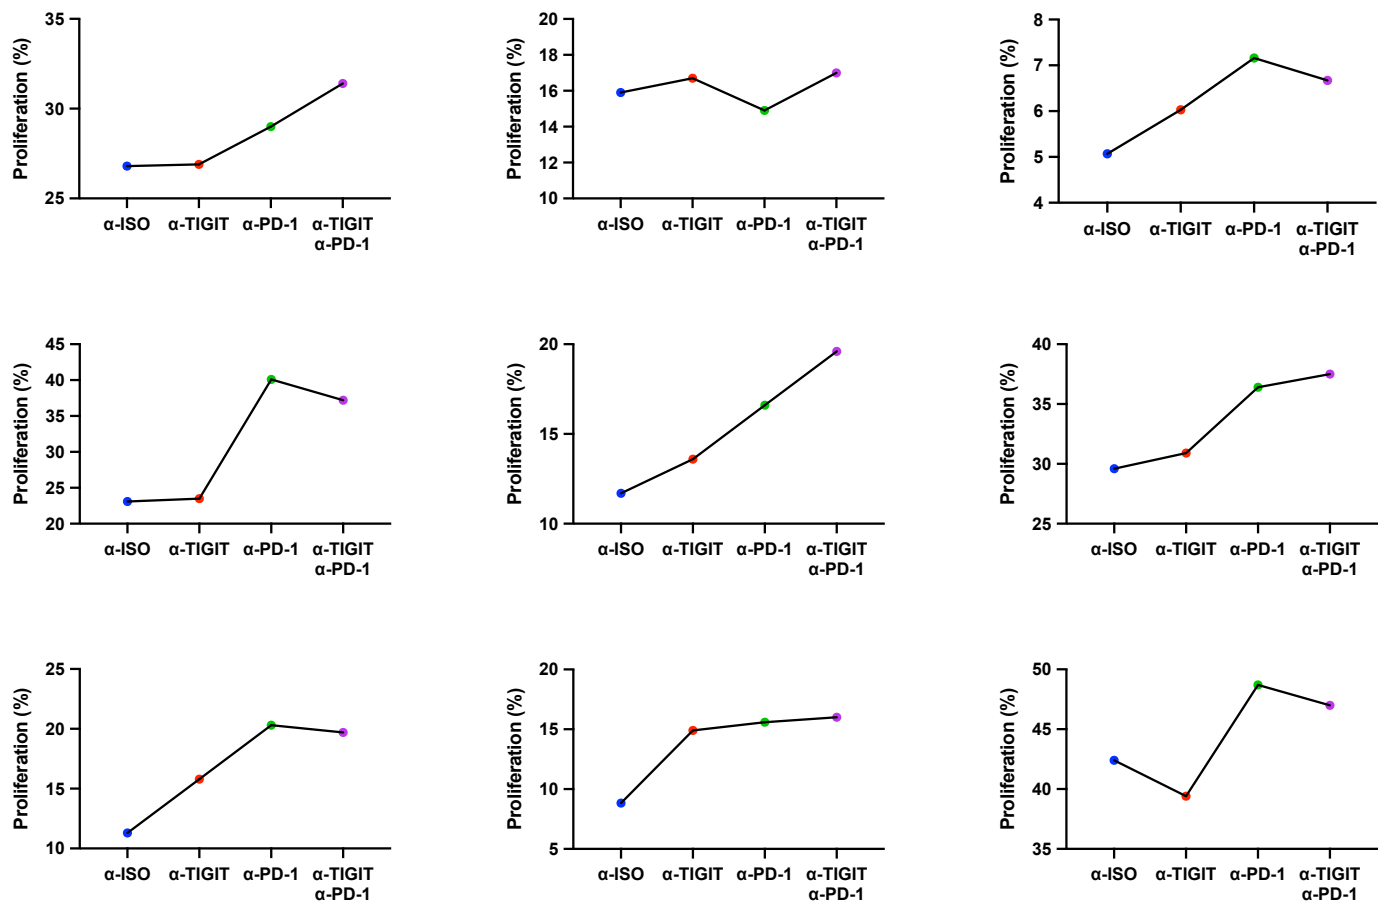

**Fig. S12**

Proliferation rate of T cells following 4-day co-culture with aAPCs expressing CD155 and PD-L1. For each condition, monoclonal blocking antibodies pre-incubated with T cells are indicated on the x-axis. Each line graph represents an individual patient.
