# Supplementary material for: Tissue-Resident Memory T Cells in Pancreatic Ductal Adenocarcinoma Coexpress PD-1 and TIGIT and Functional Inhibition Is Reversible by Dual Antibody Blockade
Source: PubMed Central journal article supplement (PMC10068448; doi:10.1158/2326-6066.cir-22-0121), 2023-01-23
Supplement: cir-22-0121_supplementary_tables_s1_-_s5_suppst1-st5.pdf [file cir-22-0121_supplementary_tables_s1_-_s5_suppst1-st5.pdf]

**Table S1. List of antibodies used for Flow Cytometry analysis**

|                         | Fluorophore   | Marker              | Clone      | Supplier      | Volume/test (μl) |
|-------------------------|---------------|---------------------|------------|---------------|------------------|
| <b>Checkpoint Panel</b> | ef506         | Viability (Fixable) | 65-0866-14 | Thermo Fisher | 0.1              |
|                         | AF700         | CD45                | HI30       | Biolegend     | 2.5              |
|                         | FITC          | CD3                 | UCHT1      | Biolegend     | 5                |
|                         | APC/Fire 750  | CD4                 | RPA-T4     | Biolegend     | 3.5              |
|                         | PerCP/Cy5.5   | CD8                 | SK1        | Biolegend     | 3                |
|                         | BV421         | PD-1                | EH12.2H7   | Biolegend     | 4                |
|                         | PE            | TIM-3               | F38-2E2    | Biolegend     | 5                |
|                         | PE-Cy7        | LAG-3               | 11C3C65    | Biolegend     | 5                |
|                         | PE/Dazzle 594 | CTLA-4              | BNI3       | Biolegend     | 5                |
|                         | APC           | TIGIT               | MBSA43     | Biolegend     | 5                |

|                                        | Fluorophore   | Marker              | Clone      | Supplier      | Volume/test (μl) |
|----------------------------------------|---------------|---------------------|------------|---------------|------------------|
| <b>Lymphocyte Quantification Panel</b> | ef506         | Viability (Fixable) | 65-0866-14 | Thermo Fisher | 0.1              |
|                                        | AF700         | CD45                | HI30       | Biolegend     | 2.5              |
|                                        | FITC          | CD3                 | UCHT1      | Biolegend     | 5                |
|                                        | PE            | TRAV1-2 (TCR Va7.2) | 3C10       | Biolegend     | 4                |
|                                        | PE/Dazzle 594 | CD19                | HIB19      | Biolegend     | 5                |
|                                        | PerCP/Cy5.5   | CD16                | 3G8        | Biolegend     | 5                |
|                                        | PE-Cy7        | CD56                | HCD56      | Biolegend     | 5                |
|                                        | APC           | pan-γδ TCR          | B1         | Biolegend     | 5                |
|                                        | APC/Fire 750  | CD161               | HP-3G10    | Biolegend     | 5                |
|                                        | BV421         | CD27                | M-T271     | Biolegend     | 4                |

**Table S2. List of antibodies used for CyTOF analysis of T cells.**

| <b>Metal conjugate</b> | <b>Marker</b>            | <b>Clone</b> | <b>Supplier</b> | <b>Volume/test (μl)</b> |
|------------------------|--------------------------|--------------|-----------------|-------------------------|
| 089Y                   | CD45                     | HI30         | Fluidigm        | 0.25                    |
| 103Rh                  | Viability                | 201103A      | Fluidigm        | 4 μM                    |
| 141Pr                  | CD103                    | Ber-ACT8     | Biologend       | 1                       |
| 142Nd                  | CD57                     | HCD57        | Fluidigm        | 0.1                     |
| 143Nd                  | CD45RA                   | HI100        | Fluidigm        | 0.3                     |
| 144Nd                  | CD38                     | HIT2         | Fluidigm        | 1                       |
| 145Nd                  | CD4                      | RPA-T4       | Fluidigm        | 0.5                     |
| 146Nd                  | IgD                      | IA62         | Fluidigm        | 1                       |
| 147Sm                  | CXCR3                    | G025H7       | Fluidigm        | 1                       |
| 148Sm                  | CD69                     | FN50         | Fluidigm        | 1                       |
| 149Sm                  | CD127                    | A019D5       | Fluidigm        | 1                       |
| 150Nd                  | HLA-DR                   | L243         | Fluidigm        | 1                       |
| 151Eu                  | CCR6                     | 11A9         | Fluidigm        | 1                       |
| 152Sm                  | TCRγδ                    | 11F2         | Fluidigm        | 0.5                     |
| 153Eu                  | TRAV1-2 (Va7.2)          | 3C10         | Fluidigm        | 1                       |
| 154Sm                  | TIGIT                    | MBSA43       | Fluidigm        | 1                       |
| 155Gd                  | Siglec 9                 | K8           | Fluidigm        | 1                       |
| 156Gd                  | CD85j                    | GHI/75       | Fluidigm        | 1                       |
| 158Eu                  | CCR4                     | L291H4       | Fluidigm        | 1                       |
| 159Tb                  | CD161                    | HP-3G10      | Fluidigm        | 1                       |
| 160Gd                  | CD28                     | CD28.2       | Fluidigm        | 0.5                     |
| 161Dy                  | CD39                     | A1           | Fluidigm        | 0.5                     |
| 162Dy                  | CD27                     | L128         | Fluidigm        | 1                       |
| 163Dy                  | CRTH2                    | BM16         | Fluidigm        | 1                       |
| 164Dy                  | CD95                     | DX2          | Fluidigm        | 1                       |
| 165Ho                  | CD19                     | HIB19        | Fluidigm        | 0.25                    |
| 166Er                  | Siglec 7                 | 6434         | Fluidigm        | 1                       |
| 167Er                  | CCR7                     | G043H7       | Fluidigm        | 1                       |
| 168Er                  | CD8                      | SK1          | Fluidigm        | 0.25                    |
| 169Tm                  | CD25                     | 2A3          | Fluidigm        | 1                       |
| 170Er                  | iNKT (Va24-Ja18)         | 6B11         | Fluidigm        | 1                       |
| 171Yb                  | DNAM                     | 11A8         | Fluidigm        | 1                       |
| 172Yb                  | CX3CR1                   | 2A91         | Fluidigm        | 1                       |
| 173Yb                  | CD3                      | UCHT1        | Biologend       | 0.25                    |
| 174Yb                  | PD-1                     | EH12.2H7     | Fluidigm        | 1                       |
| 175Lu                  | CD14                     | M5E2         | Fluidigm        | 0.5                     |
| 176Yb                  | CD56                     | HCD56        | Fluidigm        | 1                       |
| 191/193Ir              | Cell-ID Intercalator -Ir | 201192A      | Fluidigm        | 0.125 μM                |
| 209Bi                  | CD16                     | 3G8          | Fluidigm        | 0.5                     |

**Table S3. List of antibodies used for CyTOF analysis of myeloid cells.**

| <i>Metal conjugate</i> | <b>Marker</b>            | <b>Clone</b> | <b>Supplier</b> | <b>Volume/test (μl)</b> |
|------------------------|--------------------------|--------------|-----------------|-------------------------|
| <b>089Y</b>            | CD45                     | HI30         | Fluidigm        | 0.25                    |
| <b>103Rh</b>           | Viability                | 201103A      | Fluidigm        | 4 μM                    |
| <b>141Pr</b>           | IL-6R                    | UV4          | Biolegend       | 1                       |
| <b>142Nd</b>           | CD40                     | 5C3          | Fluidigm        | 1                       |
| <b>143Nd</b>           | HLA-DR                   | L243         | Biolegend       | 0.3                     |
| <b>144Nd</b>           | CD38                     | HIT2         | Fluidigm        | 1                       |
| <b>145Nd</b>           | CD163                    | GHI/61       | Fluidigm        | 1                       |
| <b>146Nd</b>           | CD64                     | 10.1         | Fluidigm        | 0.5                     |
| <b>147Sm</b>           | IFNGRa (CD119)           | GIR-208      | Biolegend       | 0.5                     |
| <b>148Sm</b>           | PD-L1                    | 29E.2A3      | Fluidigm        | 1                       |
| <b>149Sm</b>           | IL-10R                   | 3F9          | Biolegend       | 1                       |
| <b>150Nd</b>           | CD86                     | IT2.2        | Fluidigm        | 1                       |
| <b>151Eu</b>           | IL-4Ra                   | G077F6       | Biolegend       | 1                       |
| <b>152Sm</b>           | CD112                    | TX31         | Biolegend       | 1                       |
| <b>153Eu</b>           | CD32                     | FUN-2        | Fluidigm        | 1                       |
| <b>154Sm</b>           | CD3                      | UCHT1        | Fluidigm        | 1                       |
| <b>155Gd</b>           | Siglec9                  | K8           | Fluidigm        | 1                       |
| <b>156Gd</b>           | CD204                    | 7C9C20       | Biolegend       | 0.75                    |
| <b>158Eu</b>           | CD155                    | TX24         | Biolegend       | 1                       |
| <b>159Tb</b>           | Lox-1                    | 15C4         | Biolegend       | 1                       |
| <b>160Gd</b>           | CD14                     | M5E2         | Fluidigm        | 0.5                     |
| <b>161Dy</b>           | CX3CR1                   | 8F1/CXCR1    | Biolegend       | 0.5                     |
| <b>162Dy</b>           | CD80                     | 2D10.4       | Fluidigm        | 1                       |
| <b>163Dy</b>           | CD33                     | WM53         | Fluidigm        | 1                       |
| <b>164Dy</b>           | CD116                    | 4H1          | Biolegend       | 0.5                     |
| <b>165Ho</b>           | CD19                     | HIB19        | Fluidigm        | 0.25                    |
| <b>166Er</b>           | Siglec7                  | 6434         | Fluidigm        | 1                       |
| <b>167Er</b>           | CD11b                    | ICRF44       | Fluidigm        | 0.5                     |
| <b>168Er</b>           | CD206                    | 15-2         | Fluidigm        | 1                       |
| <b>169Tm</b>           | CD304                    | 12C2         | Fluidigm        | 1                       |
| <b>170Er</b>           | CD54                     | HA58         | Fluidigm        | 1                       |
| <b>171Yb</b>           | CD68                     | Y1/82A       | Fluidigm        | 0.25                    |
| <b>172Yb</b>           | PD-L2                    | 24F.10C12    | Fluidigm        | 1                       |
| <b>173Yb</b>           | CD115                    | 9-4D2-1E4    | Biolegend       | 1                       |
| <b>174Yb</b>           | TIE-2                    | 33.1 (Ab33)  | Biolegend       | 1                       |
| <b>175Lu</b>           | CXCR4                    | 12G5         | Fluidigm        | 1                       |
| <b>176Yb</b>           | CD56                     | HCD56        | Fluidigm        | 1                       |
| <b>191/193Ir</b>       | Cell-ID Intercalator -Ir | 201192A      | Fluidigm        | 0.125 μM                |
| <b>209Bi</b>           | CD16                     | 3G8          | Fluidigm        | 0.5                     |

**Table S4. List of antibodies used for Immunofluorescence staining**

| Target        | Clone      | Isotype     | Vendor           |
|---------------|------------|-------------|------------------|
| EpCAM         | Polyclonal | Rabbit IgG  | Abcam            |
| CD68          | KP1        | Mouse IgG1  | Dako Omnis       |
| aSMA          | 1A4        | Mouse IgG2A | R&D              |
| CD155 (PVR)   | Polyclonal | Rabbit IgG  | Atlas Antibodies |
| CD112 (PVRL2) | Polyclonal | Rabbit IgG  | Atlas Antibodies |
| PD-L1         | IHC411     | Rabbit IgG  | GenomeMe         |
| PD-L2         | D7U8C      | Rabbit IgG  | Cell Signalling  |

**Table S5. List of antibodies used for multiplex IHC on Lunaphore COMET platform**

| Mouse antibodies     |             |                                  |
|----------------------|-------------|----------------------------------|
| Target               | Clone       | Vendor                           |
| aSMA                 | 1A4         | Thermo Fisher Cat No. 14-9760-82 |
| CD45                 | 2B11+PD7/26 | Agilent Cat no. M070101-2        |
| CD8                  | 4B11        | Biorad Cat No. MCA1817           |
| PanCK                | AE1/AE3     | Agilent Cat no. M351501-2        |
| CD20                 | L26         | CellMarque Cat No. 120M-86       |
| anti-mouse IgG AF555 | Polyclonal  | Thermo Fisher Cat No A32727      |

| Rabbit antibodies     |            |                                    |
|-----------------------|------------|------------------------------------|
| Target                | Clone      | Vendor                             |
| TIGIT                 | E5Y1W      | Cell Signalling Cat No. 99567      |
| PD-L2                 | D7U8C      | Cell Signalling Cat No. 82723      |
| PVR (CD155)           | Polyclonal | Atlas Antibodies Cat No. HPA012568 |
| PD-1                  | EPR4877(2) | Abcam Cat No. ab137132             |
| PD-L1                 | IHC411     | GenomeMe Cat No. IHC411-100        |
| CD4                   | EPR6855    | Abcam Cat No. ab133616             |
| CD3                   | MRQ39      | CellMarque Cat No. 103R-96         |
| NA/K ATPase           | EP1845Y    | Abcam Cat No: ab76020              |
| anti-rabbit IgG AF647 | Polyclonal | Thermo Fisher Cat No. A32733       |
